# Supplementary material for: An atomic layer deposition diffusion–reaction model for porous media with different particle geometries
Source: Royal Society of Chemistry journal article supplement (doi:10.1039/d3cp05639b), 2024-01-01
Supplement: d3cp05639b1.pdf [file d3cp05639b1.pdf]

1 **Electronic supplementary information**

2

3 **An atomic layer deposition diffusion–reaction model for**  
4 **porous media with different particle geometries**

5

6 Niko Heikkinen,<sup>a</sup> Juha Lehtonen,<sup>a</sup> Riikka L. Puurunen<sup>b</sup>

7 <sup>a</sup>VTT Technical Research Centre of Finland, P.O. Box 1000, FIN-02044 VTT, Espoo, Finland.

8 <sup>b</sup> Department of Chemical and Metallurgical Engineering, Aalto University School of Chemical Engineering, Kemistintie 1, Espoo,  
9 Finland.

10 [niko.heikkinen@vtt.fi](mailto:niko.heikkinen@vtt.fi); [juha.lehtonen@vtt.fi](mailto:juha.lehtonen@vtt.fi); [riikka.puurunen@aalto.fi](mailto:riikka.puurunen@aalto.fi)

11

12 \* Corresponding author

13 [niko.heikkinen@vtt.fi](mailto:niko.heikkinen@vtt.fi) (Niko Heikkinen)

14

15

16

17 Table S1, Example calculations for the shape factor  $s$  with spherical, cylindrical and slab particle.

$R$  = Particle radius  
 $h$  = Cylindrical particle height  
 $s$  = shape factor

a) Sphere

$$A = 4\pi R^2$$

$$V = (4/3)\pi R^3$$

| $R$ | Area (A) | Volume (V) | A/V | $a=A/V^*R$ | $s = a-1$ |
|-----|----------|------------|-----|------------|-----------|
| 1   | 13       | 4          | 3,0 | 3          | 2         |
| 2   | 50       | 34         | 1,5 | 3          | 2         |
| 3   | 113      | 113        | 1,0 | 3          | 2         |
| 4   | 201      | 268        | 0,8 | 3          | 2         |
| 5   | 314      | 524        | 0,6 | 3          | 2         |

b) Cylinder

$$A = 2(\pi R^2) + 2\pi hR$$

$$V = \pi hR^2$$

| $h$  | $R$ | Area (A) | Volume (V) | A/V | $a=A/V^*R$ | $n = h/R$ | $a=2(n+1)/n$ | $s=2(n+1)/n-1$ | $s = a-1$ |
|------|-----|----------|------------|-----|------------|-----------|--------------|----------------|-----------|
| 4    | 2   | 75       | 50         | 1,5 | 3,000      | 2         | 3            | 2              | 2         |
| 10   | 2   | 151      | 126        | 1,2 | 2,400      | 5         | 2,4          | 1,4            | 1,4       |
| 100  | 2   | 1282     | 1257       | 1,0 | 2,040      | 50        | 2,04         | 1,04           | 1,04      |
| 1000 | 2   | 12592    | 12566      | 1,0 | 2,004      | 500       | 2,004        | 1,004          | 1,004     |

c) Slab

$$A = 2(xy+xR+yR)$$

$$V = xyR$$

| $x$ (depth) | $y$ (width) | $R$ | Area (A) | Volume (V) | A/V   | $a=A/V^*R*0,5$ | $s = a-1$ |
|-------------|-------------|-----|----------|------------|-------|----------------|-----------|
| 10          | 10          | 1   | 240      | 100        | 2,4   | 1,2            | 0,2       |
| 100         | 100         | 1   | 20400    | 10000      | 2,04  | 1,02           | 0,02      |
| 1000        | 1000        | 1   | 2004000  | 1000000    | 2,004 | 1,002          | 0,002     |

18

19

20

21 Table S2, Varied porous material physical properties with varying particle radius, specific surface area, pore diameter, pore volume  
 22 and Knudsen number. Bold text presents the baseline parameters.

| <b>R</b><br>Particle<br>radius (um) | <b>A<sub>0</sub></b><br>Specific<br>surface<br>area<br>(m <sup>2</sup> /g) | <b>d<sub>pore</sub></b><br>Pore<br>diameter<br>(nm) | <b>V<sub>p</sub></b><br>Pore<br>volume<br>(cm <sup>3</sup> /g) | $\bar{s}$<br><b>A<sub>0</sub>/V<sub>p</sub></b><br>(m <sup>-1</sup> ) | <b>Knudsen<br/>number</b> |
|-------------------------------------|----------------------------------------------------------------------------|-----------------------------------------------------|----------------------------------------------------------------|-----------------------------------------------------------------------|---------------------------|
| 100, 200, 300                       | 100                                                                        | 45.0                                                | 0.550                                                          | 1.82 × 10 <sup>8</sup>                                                | 155                       |
| 100, 200, 300                       | 125                                                                        | 40.0                                                | 0.560                                                          | 2.23 × 10 <sup>8</sup>                                                | 175                       |
| 100, 200, 300                       | 150                                                                        | 30.0                                                | 0.570                                                          | 2.63 × 10 <sup>8</sup>                                                | 233                       |
| 100, 200, 300                       | 175                                                                        | 25.0                                                | 0.580                                                          | 3.02 × 10 <sup>8</sup>                                                | 279                       |
| 100, 200, 300                       | <b>200</b>                                                                 | <b>20.0</b>                                         | <b>0.600</b>                                                   | <b>3.33 × 10<sup>8</sup></b>                                          | 349                       |
| 100, 200, 300                       | 225                                                                        | 19.0                                                | 0.610                                                          | 3.69 × 10 <sup>8</sup>                                                | 368                       |
| 100, 200, 300                       | 250                                                                        | 18.0                                                | 0.615                                                          | 4.07 × 10 <sup>8</sup>                                                | 388                       |
| 100, 200, 300                       | 275                                                                        | 17.0                                                | 0.620                                                          | 4.44 × 10 <sup>8</sup>                                                | 411                       |
| 100, 200, 300                       | 300                                                                        | 16.0                                                | 0.625                                                          | 4.80 × 10 <sup>8</sup>                                                | 436                       |
| 100, 200, 300                       | 325                                                                        | 15.0                                                | 0.630                                                          | 5.16 × 10 <sup>8</sup>                                                | 466                       |
| 100, 200, 300                       | 350                                                                        | 14.0                                                | 0.635                                                          | 5.51 × 10 <sup>8</sup>                                                | 499                       |
| 100, 200, 300                       | 375                                                                        | 13.0                                                | 0.640                                                          | 5.86 × 10 <sup>8</sup>                                                | 537                       |
| 100, 200, 300                       | 400                                                                        | 12.0                                                | 0.645                                                          | 6.20 × 10 <sup>8</sup>                                                | 582                       |
| 100, 200, 300                       | 425                                                                        | 11.0                                                | 0.650                                                          | 6.54 × 10 <sup>8</sup>                                                | 635                       |
| 100, 200, 300                       | 450                                                                        | 10.0                                                | 0.655                                                          | 6.87 × 10 <sup>8</sup>                                                | 698                       |
| 100, 200, 300                       | 475                                                                        | 9.0                                                 | 0.660                                                          | 7.20 × 10 <sup>8</sup>                                                | 776                       |
| 100, 200, 300                       | 500                                                                        | 8.5                                                 | 0.670                                                          | 7.46 × 10 <sup>8</sup>                                                | 822                       |
| 100, 200, 300                       | 525                                                                        | 8.0                                                 | 0.675                                                          | 7.78 × 10 <sup>8</sup>                                                | 873                       |
| 100, 200, 300                       | 550                                                                        | 7.5                                                 | 0.677                                                          | 8.13 × 10 <sup>8</sup>                                                | 931                       |
| 100, 200, 300                       | 575                                                                        | 7.0                                                 | 0.678                                                          | 8.48 × 10 <sup>8</sup>                                                | 998                       |
| 100, 200, 300                       | 600                                                                        | 6.5                                                 | 0.680                                                          | 8.83 × 10 <sup>8</sup>                                                | 1074                      |
| 100, 200, 300                       | 625                                                                        | 6.4                                                 | 0.681                                                          | 9.18 × 10 <sup>8</sup>                                                | 1091                      |
| 100, 200, 300                       | 650                                                                        | 6.3                                                 | 0.683                                                          | 9.52 × 10 <sup>8</sup>                                                | 1109                      |
| 100, 200, 300                       | 675                                                                        | 6.1                                                 | 0.684                                                          | 9.87 × 10 <sup>8</sup>                                                | 1145                      |
| 100, 200, 300                       | 700                                                                        | 6.0                                                 | 0.686                                                          | 1.02 × 10 <sup>9</sup>                                                | 1164                      |
| 100, 200, 300                       | 725                                                                        | 5.9                                                 | 0.687                                                          | 1.06 × 10 <sup>9</sup>                                                | 1184                      |
| 100, 200, 300                       | 750                                                                        | 5.7                                                 | 0.689                                                          | 1.09 × 10 <sup>9</sup>                                                | 1225                      |
| 100, 200, 300                       | 775                                                                        | 5.5                                                 | 0.690                                                          | 1.12 × 10 <sup>9</sup>                                                | 1270                      |
| 100, 200, 300                       | 800                                                                        | 5.2                                                 | 0.691                                                          | 1.16 × 10 <sup>9</sup>                                                | 1343                      |
| 100, 200, 300                       | 825                                                                        | 5.0                                                 | 0.693                                                          | 1.19 × 10 <sup>9</sup>                                                | 1397                      |
| 100, 200, 300                       | 850                                                                        | 4.8                                                 | 0.694                                                          | 1.22 × 10 <sup>9</sup>                                                | 1455                      |
| 100, 200, 300                       | 875                                                                        | 4.5                                                 | 0.696                                                          | 1.26 × 10 <sup>9</sup>                                                | 1552                      |
| 100, 200, 300                       | 900                                                                        | 4.2                                                 | 0.697                                                          | 1.29 × 10 <sup>9</sup>                                                | 1663                      |
| 100, 200, 300                       | 925                                                                        | 4.0                                                 | 0.699                                                          | 1.32 × 10 <sup>9</sup>                                                | 1746                      |
| 100, 200, 300                       | 950                                                                        | 3.8                                                 | 0.700                                                          | 1.36 × 10 <sup>9</sup>                                                | 1838                      |
| 100, 200, 300                       | 975                                                                        | 3.6                                                 | 0.702                                                          | 1.39 × 10 <sup>9</sup>                                                | 1940                      |
| 100, 200, 300                       | 1000                                                                       | 3.4                                                 | 0.703                                                          | 1.42 × 10 <sup>9</sup>                                                | 2054                      |

24 Knudsen number ( $Kn$ )

25 The Knudsen number ( $Kn$ ) in the Equation S1 is determined as the mean free path ( $\lambda$ ) divided by the pore  
26 diameter ( $d_{pore}$ ) [1]:

27 Equation S1

$$28 \quad Kn = \frac{\text{The mean free path, } \lambda \text{ (m)}}{\text{Pore diameter, } d_{pore} \text{ (m)}}$$

29 The mean free path ( $\lambda_{0,A}$ ) of the reactant molecule is given in the Equation S2 [2]:

30 Equation S2

$$31 \quad \lambda_{0,A} = \frac{k_B T}{\sqrt{2} p_A \sigma_{A,A} + \sqrt{1 + \frac{m_A}{m_B}} p_I \sigma_{A,I}}$$

32 Where  $k_B$  is the Boltzmann constant ( $m^2 \text{ kg s}^{-2} \text{ K}^{-1}$ ),  $T$  is temperature (K),  $p_A$  is the reactant partial pressure  
33 (Pa),  $p_I$  is the inert carrier gas partial pressure (Pa),  $\sigma_{A,A}$  is the collision cross-section of the reactant molecule,  
34  $\sigma_{A,I}$  is the collision cross-section between the reactant and inert carrier gas molecule,  $m_A$  is reactant molar  
35 mass ( $\text{kg mol}^{-1}$ ) and  $m_B$  is the molar mass of the inert carrier gas ( $\text{kg mol}^{-1}$ ).

36 The collision cross-section of the reactant molecule ( $\sigma_{A,A}$ ) is given in the Equation S3 and the collision cross-  
37 section between reactant molecule and inert carrier gas molecule ( $\sigma_{A,I}$ ) is presented in the Equation S4 [3]:

38 Equation S3

$$39 \quad \sigma_{A,A} = \pi d_A^2$$

40 Equation S4

$$41 \quad \sigma_{A,I} = \pi \left( \frac{d_A}{2} + \frac{d_I}{2} \right)^2$$

42 Where  $d_A$  is the reactant molecule diameter and  $d_I$  is the inert carrier gas molecule diameter.

43

44

45

46 Table S3, Knudsen number and the mean free path calculation (above) and an example of Kn value calculation (below) with 45 nm  
 47 pore diameter and relevant parameters for the ALD process in our modelling work.

**Knudsen number calculation example**

|                                            |             |                                                                                 |
|--------------------------------------------|-------------|---------------------------------------------------------------------------------|
| KB [m <sup>2</sup> kg/ (s <sup>2</sup> K)] | 1,38065E-23 | The Boltzmann constant                                                          |
| pA [Pa]                                    | 100         | Reactant partial pressure                                                       |
| pI [Pa]                                    | 500         | Inert carrier gas (N2) partial pressure                                         |
| d <sub>A</sub> [m]                         | 6E-10       | Reactant molecule diameter                                                      |
| d <sub>I</sub> [m]                         | 3,74E-10    | Inert carrier gas (N2) molecular diameter                                       |
| T [K]                                      | 423,15      | ALD process temperature                                                         |
| rA [m]                                     | 3E-10       | Reactant molecule radius                                                        |
| rI [m]                                     | 1,87E-10    | Inert carrier gas (N2) molecular diameter                                       |
| σ <sub>A,A</sub>                           | 2,83E-19    | The collision cross-section between two reactant molecules                      |
| σ <sub>A,I</sub>                           | 7,45E-19    | The collision cross-section between the reactant and inert carrier gas molecule |
| MA [kg/mol]                                | 0,1         | Molar mass of reactant                                                          |
| MI [kg/mol]                                | 0,028       | Molar mass of inert carrier gas                                                 |
| Mean free path [m]                         | 6,98E-06    |                                                                                 |
| Mean free path [nm]                        | 6984        |                                                                                 |
| Pore diameter [nm]                         | 45          |                                                                                 |
| Pore diameter [m]                          | 4,50E-08    |                                                                                 |
| Knudsen number (Kn)                        | 155         |                                                                                 |

48

49

50 Table S4, The effect of selecting volumetric reactant number density ( $m^{-3}$ ) or partial pressure (Pa) in a diffusion–reaction model as a  
 51 function of temperature. Reactant partial pressure, volumetric reactant number density, ALD process temperature and achieved  
 52 coating penetration depth ( $r_{\vartheta=1/2}$ ).

|                                          | Reactant A partial pressure (Pa) | Volumetric reactant number density ( $m^{-3}$ ) | ALD process Temperature (K) | Penetration depth ( $\mu m$ )* |
|------------------------------------------|----------------------------------|-------------------------------------------------|-----------------------------|--------------------------------|
| Fixed Partial pressure                   | 100                              | 1,94E+22                                        | 373                         | 142                            |
|                                          | 100                              | 1,71E+22                                        | 423                         | 136                            |
|                                          | 100                              | 1,53E+22                                        | 473                         | 131                            |
|                                          | 100                              | 1,38E+22                                        | 523                         | 127                            |
|                                          | 100                              | 1,26E+22                                        | 573                         | 124                            |
|                                          | 150                              | 2,91E+22                                        | 373                         | 188                            |
|                                          | 150                              | 2,57E+22                                        | 423                         | 179                            |
|                                          | 150                              | 2,30E+22                                        | 473                         | 172                            |
|                                          | 150                              | 2,08E+22                                        | 523                         | 167                            |
|                                          | 150                              | 1,90E+22                                        | 573                         | 161                            |
|                                          | 200                              | 3,88E+22                                        | 373                         | 245                            |
|                                          | 200                              | 3,42E+22                                        | 423                         | 229                            |
|                                          | 200                              | 3,06E+22                                        | 473                         | 217                            |
|                                          | 200                              | 2,77E+22                                        | 523                         | 207                            |
|                                          | 200                              | 2,53E+22                                        | 573                         | 200                            |
| Fixed volumetric reactant number density | 100                              | 1,94E+22                                        | 373                         | 142                            |
|                                          | 113,5                            | 1,94E+22                                        | 423                         | 148                            |
|                                          | 126,5                            | 1,94E+22                                        | 473                         | 153                            |
|                                          | 140                              | 1,94E+22                                        | 523                         | 159                            |
|                                          | 153,5                            | 1,94E+22                                        | 573                         | 164                            |
|                                          | 88                               | 1,71E+22                                        | 373                         | 131                            |
|                                          | 100                              | 1,71E+22                                        | 423                         | 136                            |
|                                          | 111,5                            | 1,71E+22                                        | 473                         | 141                            |
|                                          | 123,5                            | 1,71E+22                                        | 523                         | 146                            |
|                                          | 135                              | 1,71E+22                                        | 573                         | 150                            |
|                                          | 79                               | 1,53E+22                                        | 373                         | 122                            |
|                                          | 89,5                             | 1,53E+22                                        | 423                         | 127                            |
|                                          | 100                              | 1,53E+22                                        | 473                         | 132                            |
|                                          | 110,5                            | 1,53E+22                                        | 523                         | 136                            |
|                                          | 121                              | 1,53E+22                                        | 573                         | 140                            |

\* Penetration depth for a spherical particle

Plotted values in Figure 8 marked with grey color

53

54

## 55 References

56 [1] M. Knudsen, *Ann. Phys.* 333 (1909) 75–130.

57 [2] J. Yim, E. Verkama, J.A. Velasco, K. Arts, R.L. Puurunen, *Phys. Chem. Chem. Phys.* 24 (2022) 8645–8660.

58 [3] J. Atkins, Peter; De Paula, *Atkins' Physical Chemistry*, 8. ed., Oxford Univ. Press, 2006.

59
